# Supplementary material for: Chitin-Derived Nanocatalysts for Reductive Amination Reactions
Source: MDPI journal article supplement (doi:10.3390/ma16020575), 2023-01-06
Supplement: s1 [file s1]

## SUPPORTING INFORMATION

### Chitin-Derived Nanocatalysts for Reductive Amination Reactions

Daniele Polidoro <sup>1</sup>, Daily Rodriguez-Padron <sup>1\*</sup>, Alvise Perosa <sup>1</sup>, Rafael Luque <sup>2,3</sup> and Maurizio Selva <sup>1,\*</sup>

<sup>1</sup> Department of Molecular Science and Nanosystems, Ca' Foscari University of Venice, Via Torino 155, 30175 Venezia Mestre, Italy

<sup>2</sup> Department of Natural Sciences, Mid Sweden University, Holmgatan 10, 85170 Sundsvall, Sweden.

<sup>3</sup> Universidad ECOTEC, Km. 13.5 Samborondón, Samborondón, EC092302, Ecuador

\* D.R.-P. [daily.rodriguez@unive.it](mailto:daily.rodriguez@unive.it); \*M.S. [selva@unive.it](mailto:selva@unive.it)

#### Characterization data

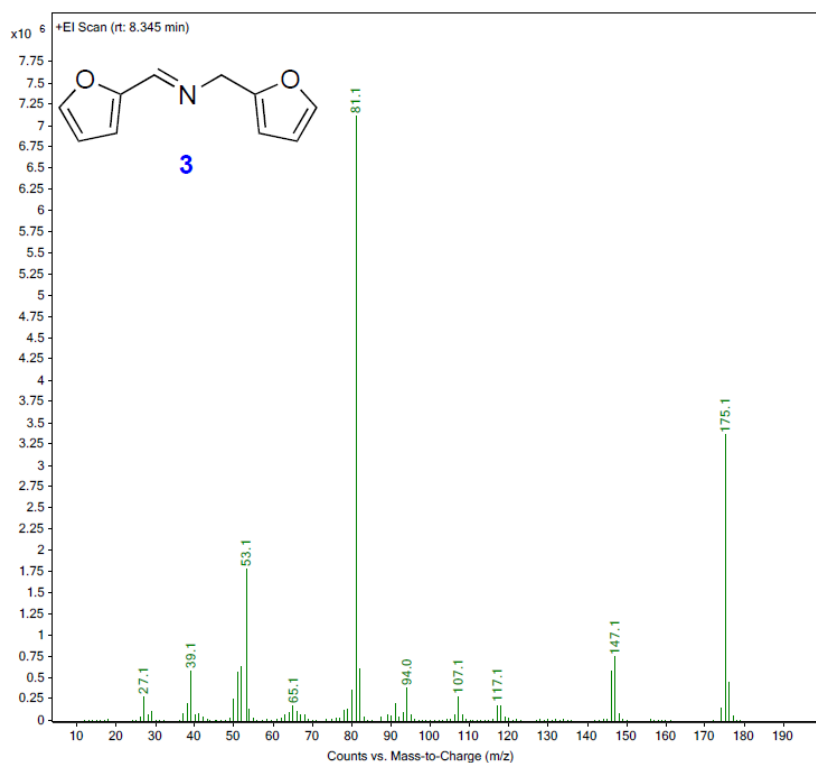

**Figure S1.** Mass Spectrum of 3 (EI, 70 eV).

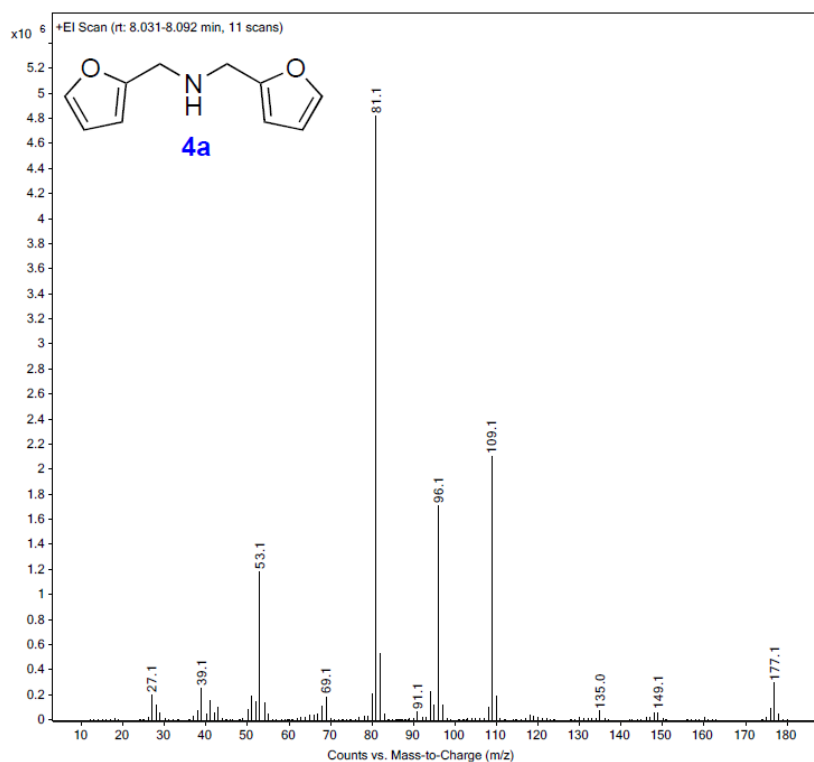

Figure S2. Mass Spectrum of **4a** (EI, 70 eV).

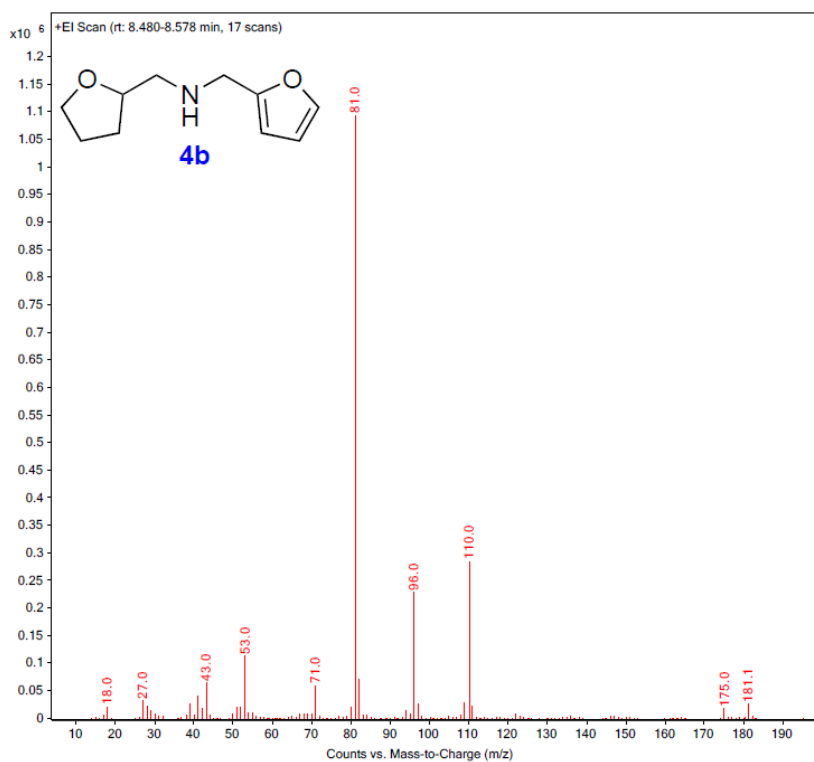

Figure S3. Mass Spectrum of **4b** (EI, 70 eV).

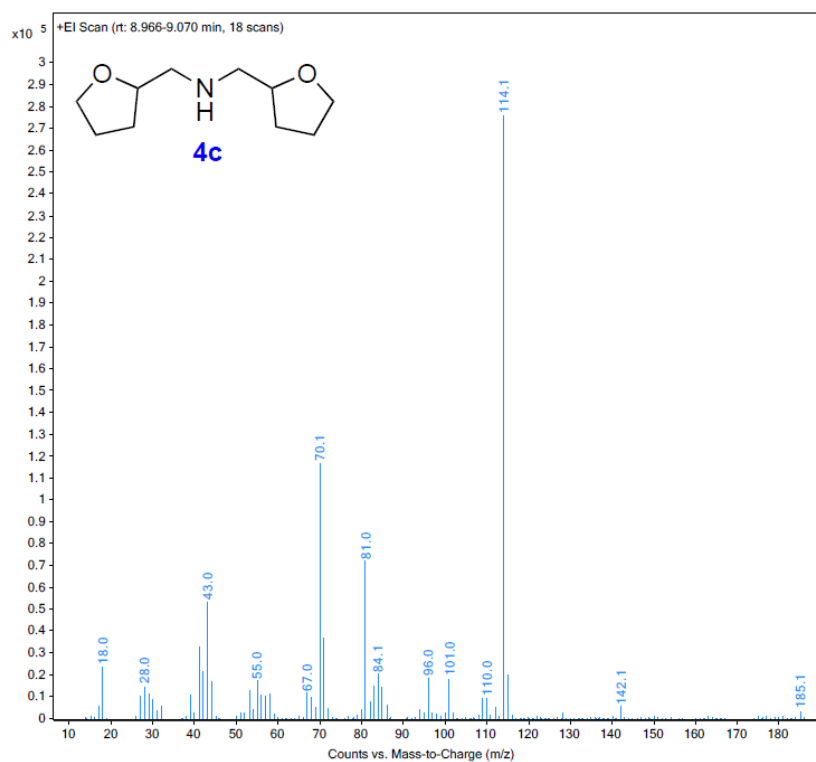

**Figure S4.** Mass Spectrum of **4c** (EI, 70 eV).
